# Supplementary material for: Anti-MPER antibodies with heterogeneous neutralization capacity are detectable in most untreated HIV-1 infected individuals
Source: PubMed Central journal article supplement (PMC4067070; doi:10.1186/1742-4690-11-44), 2014-06-07
Supplement: 1742-4690-11-44-S1.pdf [file 1742-4690-11-44-S1.pdf]

**Additional file 1.**

**Molinos-Albert & Carrillo et al.**

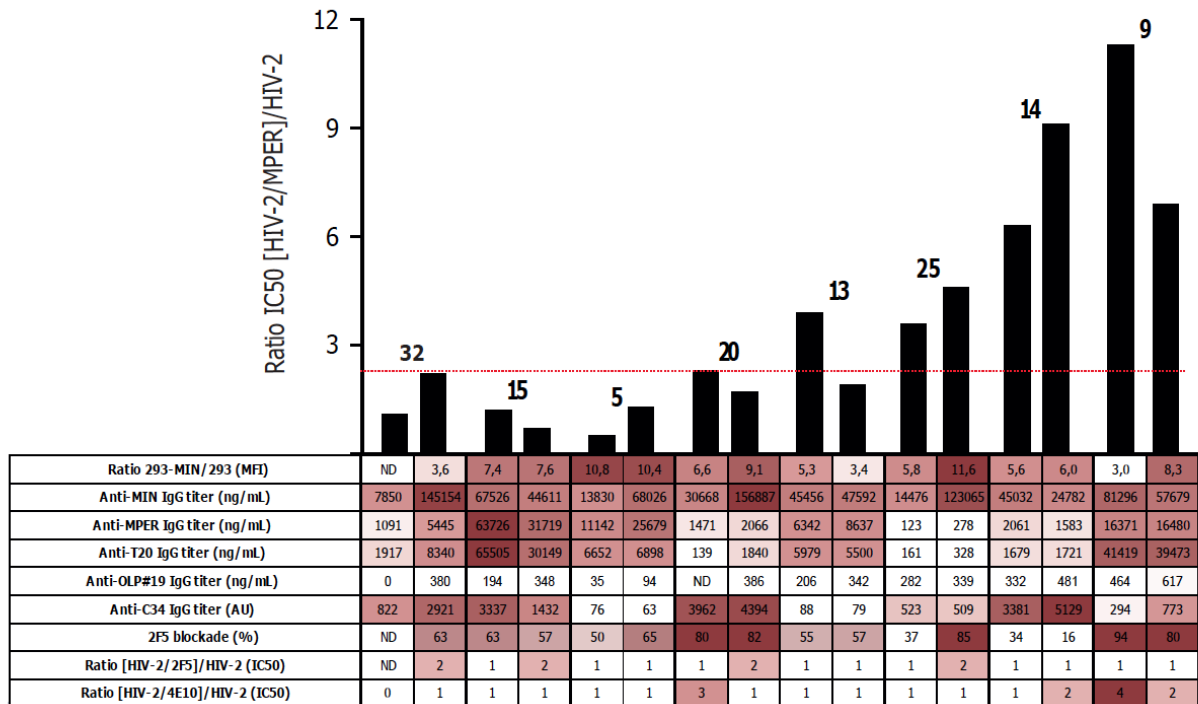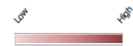

**Longitudinal analysis of MPER-like neutralization capacity of selected plasma samples.** Bar graph show the level of specific MPER-like neutralization, expressed as described in Figure 5 for longitudinal analysis of plasma samples. Numbers on the top of paired bars indicate patient code. The table displays the values of the different parameters evaluated in the study for each plasma tested. Color code indicated in the lower right corner and corresponds to that used in Figure 5.
